# Supplementary material for: Tug-of-war: molecular dynamometers against living cells for analyzing sub-piconewton interaction of a specific protein with the cell membrane
Source: Royal Society of Chemistry journal article supplement (doi:10.1039/d1sc03059k), 2021-01-01
Supplement: d1sc03059k2.pdf [file d1sc03059k2.pdf]

# Analyzing Protein-Membrane Interaction Forces at Sub-Piconewton Levels

Chemical  
Science

Membrane-protein interactions on the cell membrane govern various biological events

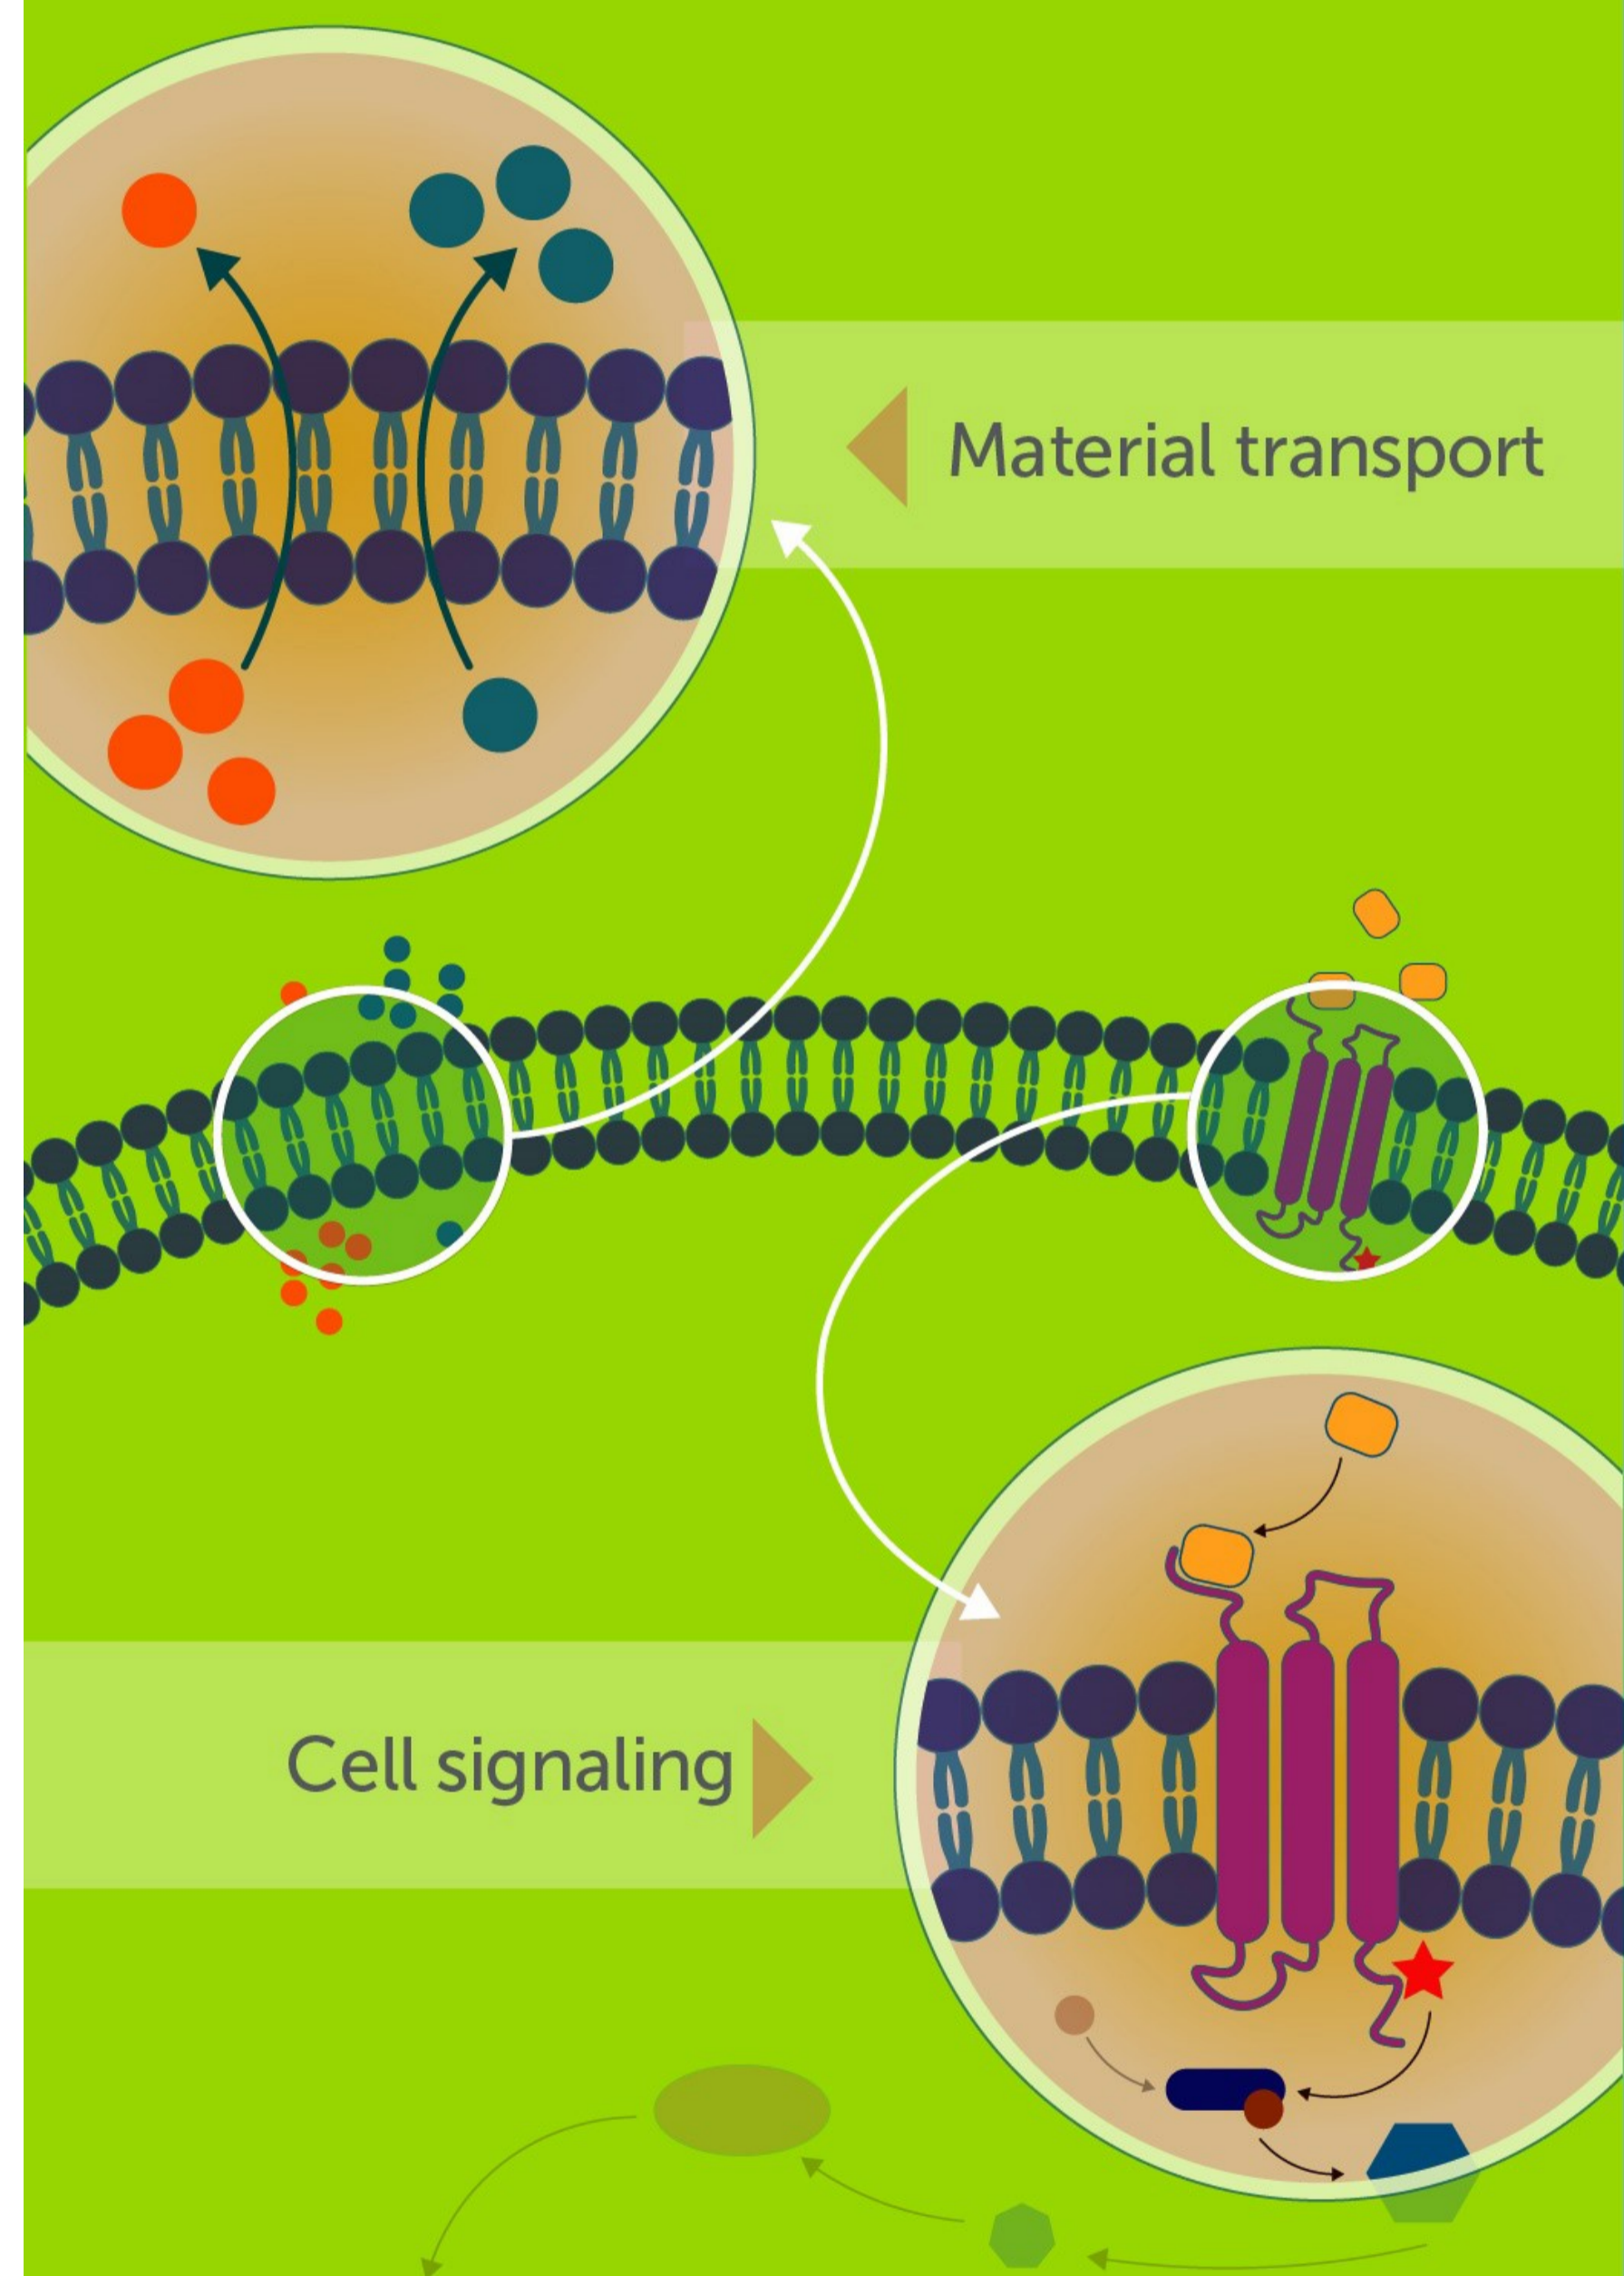

However, most methods analyzing the interaction forces either require an artificial biological environment or are not sensitive enough

A highly sensitive technique involving a molecular dynamometer (MDM) engaged in a **tug-of-war** with cell membrane target proteins is designed for measuring protein-membrane interactions on living cells

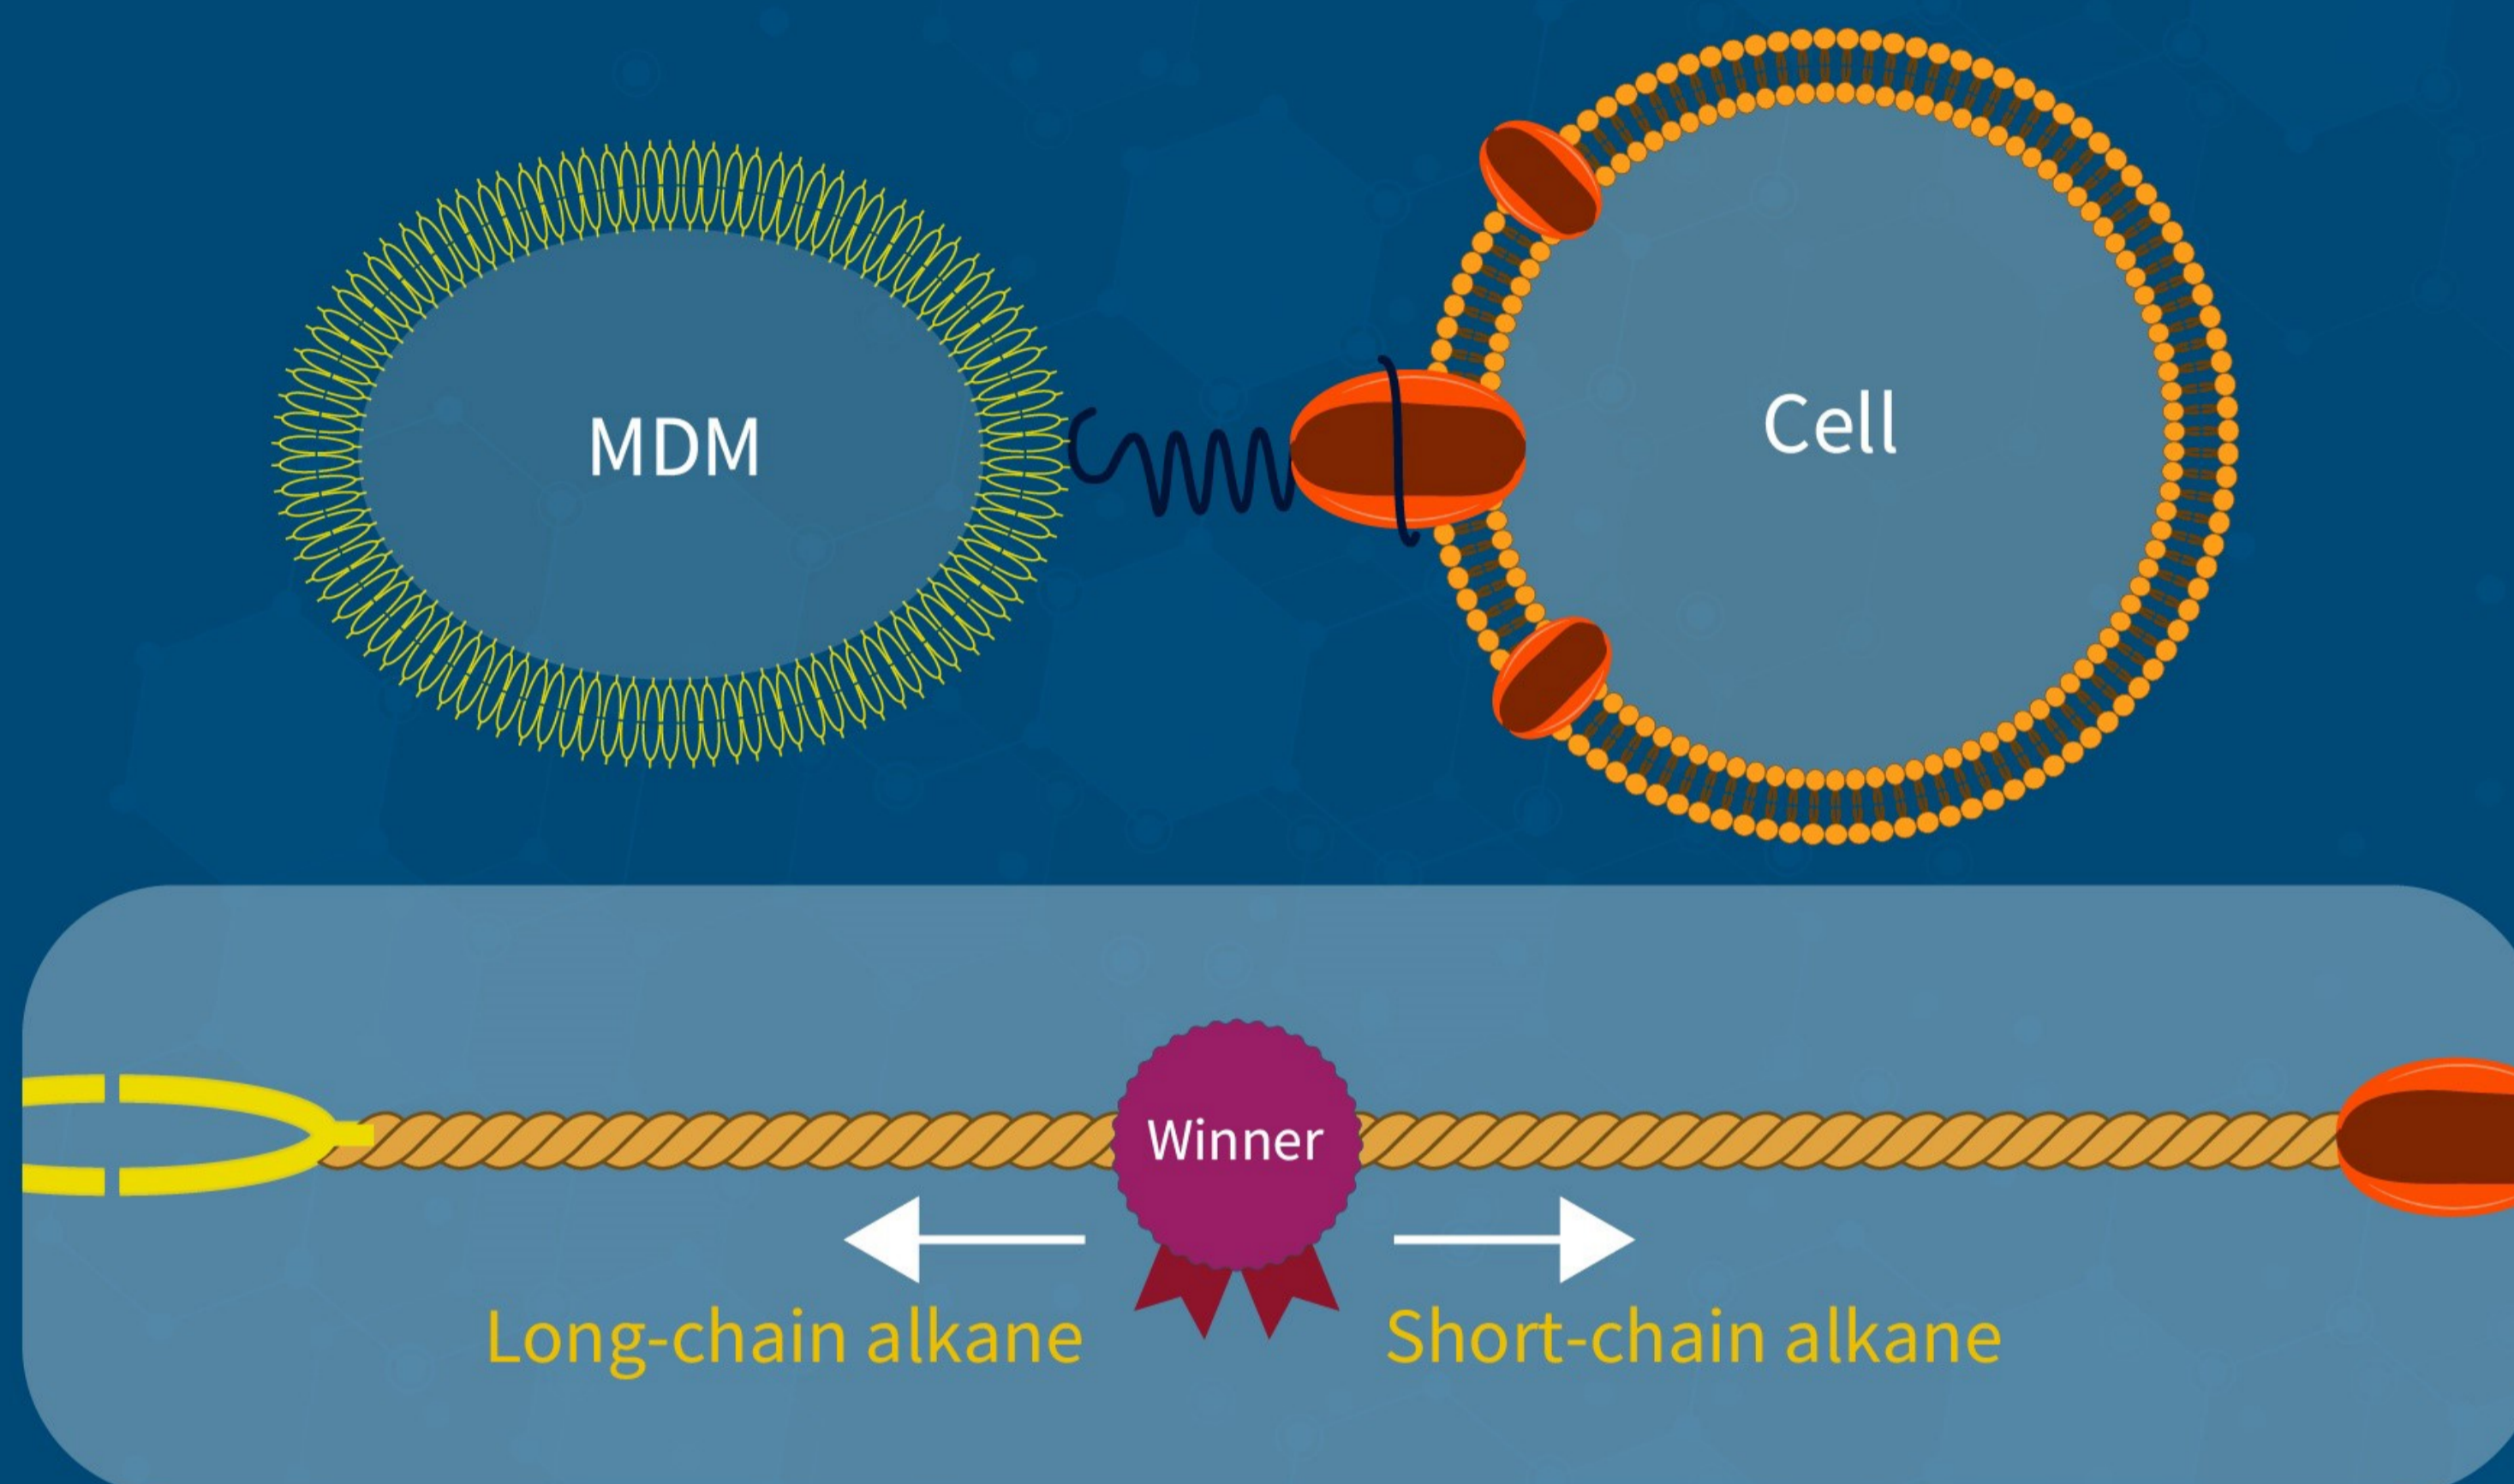

- ➔ Measures interacting forces at the **sub-piconewton** level
- ➔ Transduces fluorescent signal to mechanical signal
- ➔ Can be extended to other biological molecules on plasma membrane surface by changing the corresponding recognition components

**This convenient and highly-sensitive tool can be effectively used for mechanics-related research on biological systems**
